# Supplementary material for: A systematic review of clinical health conditions predicted by machine learning diagnostic and prognostic models trained or validated using real-world primary health care data
Source: PubMed Central journal article supplement (PMC10491005; doi:10.1371/journal.pone.0274276), 2023-09-08
Supplement: pone.0274276.s002.pdf [file pone.0274276.s002.pdf]

**Supplementary Table**

S2 Table: Characteristics of the included ML predictive models (Adopted and modified from [141])

|                                                 | <b>Advantages</b>                                                      | <b>Disadvantages</b>                                                                                                               | <b>Diseases predicted using the model</b>                                                                                                                                                                                                                                                                                                                                                                                                                                                                                                                                                                                                                                                                                                                                                                                                                                                                                                                                                                                         |
|-------------------------------------------------|------------------------------------------------------------------------|------------------------------------------------------------------------------------------------------------------------------------|-----------------------------------------------------------------------------------------------------------------------------------------------------------------------------------------------------------------------------------------------------------------------------------------------------------------------------------------------------------------------------------------------------------------------------------------------------------------------------------------------------------------------------------------------------------------------------------------------------------------------------------------------------------------------------------------------------------------------------------------------------------------------------------------------------------------------------------------------------------------------------------------------------------------------------------------------------------------------------------------------------------------------------------|
| <b>Random forest</b><br>(Number of studies: 58) | -Ability to handle datasets with a large number of predictor variables | -Ignores the spatial locations of the observations so any spatial autocorrelation in the data not accounted for by the covariates. | Alzheimer's disease [28][89] [90] [91] [92] [94] [98] [99] [101]<br>Anxiety [93]<br>Any cardiovascular disorder [29][55] [59] [60] [65]<br>Any mental disorder [100]<br>Asthma [113] [116]<br>Atherosclerosis [64]<br>Atrial fibrillation [53] [124]<br>Chronic obstructive pulmonary disease [118]<br>Chronic kidney disease [87]<br>Colorectal cancer [37] [107] [131] [128] [130]<br>Diabetes mellitus [40] [69] [74] [79]<br>Diabetic polyneuropathy [78] [80]<br>Epilepsy [111]<br>Familial hypercholesterolaemia [31] [39] [82]<br>Fibromyalgia [104]<br>Gestational diabetes [81]<br>Heart Failure [49] [57] [58]<br>Hypertension [51] [62]<br>Inflammatory bowel disease [67]<br>Major depressive disorder [41]<br>Myocardial infarction [43]<br>Obesity [73]<br>Pancreatic cancer [108]<br>Post stroke spasticity [110]<br>Post traumatic stress disorder [96]<br>Preeclampsia [36]<br>Primary Aldosteronism[70]<br>Progressive supranuclear palsy [112]<br>Rheumatoid arthritis [35]<br>Stroke [48]<br>Suicidality [85] |
| <b>Support Vector Machine (SVM)</b>             | -Ability to provide non-linear solutions                               | -Require knowledge about the kernel employed to be able to achieve good performance                                                | Alzheimer's disease [30] [89] [94] [98] [101]<br>Any cardiovascular disorder [52] [55]<br>Any mental disorder [100]                                                                                                                                                                                                                                                                                                                                                                                                                                                                                                                                                                                                                                                                                                                                                                                                                                                                                                               |

|                                                                     |                                                                                                                                              |                                                        |                                                                                                                                                                                                                                                                                                                                                                                                                                                                                                                                                                                                                                           |
|---------------------------------------------------------------------|----------------------------------------------------------------------------------------------------------------------------------------------|--------------------------------------------------------|-------------------------------------------------------------------------------------------------------------------------------------------------------------------------------------------------------------------------------------------------------------------------------------------------------------------------------------------------------------------------------------------------------------------------------------------------------------------------------------------------------------------------------------------------------------------------------------------------------------------------------------------|
| (Number of studies: 30)                                             |                                                                                                                                              |                                                        | <p>Atrial fibrillation [53] [124]<br/> Chronic obstructive pulmonary disease [132]<br/> Diabetes mellitus [72] [79]<br/> Diabetic foot [45]<br/> Diabetic polyneuropathy [77] [78] [80]<br/> Epilepsy [111]<br/> Heart failure [50] [57] [58] [66]<br/> Hypertension [51] [56]<br/> Influenza [46]<br/> Major depressive disorder [41]<br/> Post-partum depression [33]<br/> Post-traumatic stress disorder [96] [103]<br/> Preeclampsia [36]</p>                                                                                                                                                                                         |
| <p><b>Boosting models</b><br/> (Number of studies: 28)</p>          | <p>-Ability to handle categorical features<br/> -Few parameters to tune<br/> -Good performance in datasets with large number of features</p> | <p>-Interpretability of ensemble can be questioned</p> | <p>Alzheimer's disease [98]<br/> Anxiety [93]<br/> Any cardiovascular disorder [55] [65] [60]<br/> Any mental disorder [100]<br/> Asthma [115] [116]<br/> Atherosclerosis [64]<br/> Chronic obstructive pulmonary disease [118] [120]<br/> Colorectal cancer [37] [131] [128]<br/> Diabetes mellitus [74] [40]<br/> Diabetic polyneuropathy [80]<br/> Familial hypercholesterolemia [31]<br/> Heart failure [57] [66]<br/> Hypertension [51] [56]<br/> Lung cancer [109]<br/> Non-tuberculous mycobacterial lung disease [114]<br/> Obesity [73]<br/> Pancreatic cancer [108]<br/> Post-partum depression [33]<br/> Preeclampsia [36]</p> |
| <p><b>Decision tree techniques</b><br/> (Number of studies: 25)</p> | <p>-Ability to provide non-linear solutions</p>                                                                                              | <p>-Interpretability of ensemble can be questioned</p> | <p>Alzheimer's disease [98] [101]<br/> Ankylosing spondylitis [42] [106]<br/> Any cardiovascular disorder [55]<br/> Any mental disorder [100]<br/> Chronic kidney disease [86]<br/> Colorectal cancer [107]<br/> COVID-19 [117]</p>                                                                                                                                                                                                                                                                                                                                                                                                       |

|                                                                                           |                                                                                 |                                                                                                    |                                                                                                                                                                                                                                                                                                                               |
|-------------------------------------------------------------------------------------------|---------------------------------------------------------------------------------|----------------------------------------------------------------------------------------------------|-------------------------------------------------------------------------------------------------------------------------------------------------------------------------------------------------------------------------------------------------------------------------------------------------------------------------------|
|                                                                                           |                                                                                 |                                                                                                    | Diabetes mellitus [40] [68] [75]<br>Diabetic polyneuropathy [77] [78] [80]<br>Heart failure [57]<br>Hypertension[51] [56]<br>Lung cancer [109]<br>Obesity [71]<br>Post-partum depression [33]<br>Preeclampsia [36]<br>Rheumatoid arthritis [35] [42]<br>Stroke [123]                                                          |
| <b>Naïve Bayes</b><br>(Number of studies: 8)                                              | -Good performance in small datasets if conditional independent assumption holds | -Assumption of independence between features                                                       | Alzheimer's disease [89] [91] [94] [98]<br>Any cardiovascular disease [63]<br>Epilepsy [111]<br>Major depressive disorder [41]<br>Obesity [71]                                                                                                                                                                                |
| <b>k-nearest neighbors</b><br>(Number of studies: 8)                                      | -Intuitive algorithm                                                            | -Number of neighbors must be defined by user<br>-High relative computational complexity            | Alzheimer's disease [98]<br>Any cardiovascular disease [52] [55]<br>Heart failure [50] [58]<br>Hypertension [51]<br>Diabetes mellitus [32] [72]                                                                                                                                                                               |
| <b>Least absolute shrinkage and selection operator (LASSO)</b><br>(Number of studies: 15) | -Good performance with small datasets                                           | -Data assumptions are needed to be complied<br>-Can only provide linear solutions                  | Anxiety [93]<br>Any cardiovascular disease [29] [60]<br>Atrial fibrillation [53] [124]<br>Back pain [105]<br>Diabetes mellitus [69] [75]<br>Diabetic nephropathy [76]<br>Major depressive disorder [95]<br>Obesity [73]<br>Pancreatic cancer [108]<br>Stroke [123]<br>Suicidality [84]<br>Systematic lupus erythematosus [34] |
| <b>Artificial Neural Network (ANN)</b><br>(Number of studies: 35)                         | -State-of-the-art results<br>-Direct complex image processing                   | -Many parameters to fine-tune<br>-Large number of samples are required to achieve good performance | Alzheimer's disease [28] [89] [92] [97] [101] [102]<br>Any cardiovascular disorder [55] [65]<br>Any mental disorder [100]<br>Asthma [116]<br>Atrial fibrillation [53] [124]<br>Chronic kidney disease [86]                                                                                                                    |

|  |  |  |                                                                                                                                                                                                                                                                                                                                                                                                                                                                     |
|--|--|--|---------------------------------------------------------------------------------------------------------------------------------------------------------------------------------------------------------------------------------------------------------------------------------------------------------------------------------------------------------------------------------------------------------------------------------------------------------------------|
|  |  |  | <p>Chronic obstructive pulmonary disease [120]<br/>Diabetes mellitus [47]<br/>Diabetic polyneuropathy [78]<br/>Diabetic retinopathy [44] [38] [125][126] [127]<br/>Familial hypercholesterolemia [31]<br/>Gastroesophageal reflux [26]<br/>Heart failure [49] [50] [57]<br/>Hypertension [54] [61]<br/>Influenza [119]<br/>Pancreatic cancer [108]<br/>Post-traumatic stress disorder [96] [103]<br/>Preeclampsia [36]<br/>Psychosis [122]<br/>Suicidality [83]</p> |
|--|--|--|---------------------------------------------------------------------------------------------------------------------------------------------------------------------------------------------------------------------------------------------------------------------------------------------------------------------------------------------------------------------------------------------------------------------------------------------------------------------|
