# Supplementary material for: A systematic review of clinical health conditions predicted by machine learning diagnostic and prognostic models trained or validated using real-world primary health care data
Source: PubMed Central journal article supplement (PMC10491005; doi:10.1371/journal.pone.0274276), 2023-09-08
Supplement: pone.0274276.s003.pdf [file pone.0274276.s003.pdf]

## Search strategy

### PICOTS:

- **Population:** patients with any health condition within primary health care.
- **Index test:** Machine learning prediction models.
- **Comparator:** usual care, any other non-machine learning model, or none.
- **Outcome:** specific primary outcome of each health condition.
- **Timing:** before or at diagnosis point and short- or long-term follow up points.
- **Setting:** ambulatory settings worldwide.

### Search string:

Literature search using only population and index test search strings. Primary outcomes of health conditions were not used as search terms for the wide scope of the review. Search string were as follows:

| <b>Population</b>                    | <b>Index test</b>                   |
|--------------------------------------|-------------------------------------|
| Primary health care [MeSH Term]      | Machine Learning [MeSH term]        |
| Primary healthcare / Primary care    | Artificial intelligence [MeSH Term] |
| General practice [MeSH Term]         | Deep Learning [MeSH Term]           |
| Family practice / Family medicine    |                                     |
| Ambulatory care / Ambulatory setting |                                     |
| Nursing                              |                                     |

### Database search:

Applied filters: 1990-2022, primary studies and reviews, and all fields/full-text search.

Search was conducted on **05.08.2021** and updated on **04.01.2022**.

|                                                                                                                                                                                                                                                                                                                                 |           |
|---------------------------------------------------------------------------------------------------------------------------------------------------------------------------------------------------------------------------------------------------------------------------------------------------------------------------------|-----------|
| <b>Web of Science (include 8 databases)</b>                                                                                                                                                                                                                                                                                     |           |
| TS=("machine learning" OR "artificial intelligence" OR "deep learning")<br>Databases= WOS, BCI, BIOSIS, CCC, KJD, MEDLINE, RSCI, SCIELO<br>Timespan=1990-2022, Search language=Auto                                                                                                                                             | 501,34    |
| TS=("primary health care" OR "primary healthcare" OR "primary care" OR<br>"general pract*" OR "family pract*" OR "ambulatory setting*" OR nurs* OR<br>"ambulatory care" OR "family medicine")<br>Databases= WOS, BCI, BIOSIS, CCC, KJD, MEDLINE, RSCI, SCIELO<br>Timespan=1990-2022<br>Search language=Auto                     | 1,077,792 |
| #1 AND #2                                                                                                                                                                                                                                                                                                                       | 2,141     |
| <b>PubMed</b>                                                                                                                                                                                                                                                                                                                   |           |
| ("machine learning" OR "artificial intelligence" OR "deep learning") Filters<br>applied: Clinical Trial, Observational Study, Randomized Controlled Trial,<br>Review, Systematic Review, Validation Study                                                                                                                       | 10,974    |
| ("primary health care" OR "primary healthcare" OR "primary care" OR "general<br>pract*" OR "family pract*" OR "ambulatory setting*" OR nurs* OR<br>"ambulatory care" OR "family medicine")<br>Filters applied: Clinical Trial, Observational Study, Randomized Controlled<br>Trial, Review, Systematic Review, Validation Study | 194,847   |
| #1 AND #2                                                                                                                                                                                                                                                                                                                       | 340       |
| <b>Cochrane Library</b>                                                                                                                                                                                                                                                                                                         |           |
| ("machine learning" OR "artificial intelligence" OR "deep learning") with<br>Cochrane Library publication date Between Jan 1990 and Jan 2022, in Cochrane<br>Reviews, Trials (Word variations have been searched)                                                                                                               | 2,292     |

|                                                                                                                                                                                                                                                                                                                             |           |
|-----------------------------------------------------------------------------------------------------------------------------------------------------------------------------------------------------------------------------------------------------------------------------------------------------------------------------|-----------|
| ("primary health care" OR "primary healthcare" OR "primary care" OR "general pract*" OR "family pract*" OR "ambulatory setting*" OR nurs* OR "ambulatory care" OR "family medicine") with Cochrane Library publication date Between Jan 1990 and Jan 2022, in Cochrane Reviews, Trials (Word variations have been searched) | 86,323    |
| #1 AND #2                                                                                                                                                                                                                                                                                                                   | 138       |
| <b>Elsevier-Embase</b>                                                                                                                                                                                                                                                                                                      |           |
| ('machine learning'/exp OR 'machine learning' OR 'artificial intelligence'/exp OR 'artificial intelligence' OR 'deep learning'/exp OR 'deep learning') AND [1990-2022]/py                                                                                                                                                   | 293,714   |
| ('primary health care' OR 'primary healthcare' OR 'primary care' OR 'general pract*' OR 'family pract*' OR 'ambulatory setting*' OR nurs* OR 'ambulatory care' OR 'family medicine') AND [1990-2022]/py                                                                                                                     | 1,465,194 |
| #1 AND #2                                                                                                                                                                                                                                                                                                                   | 4,973     |
| <b>Elsevier-Scopus</b>                                                                                                                                                                                                                                                                                                      |           |
| ALL ( {machine learning} OR {artificial intelligence} OR {deep learning} ) AND PUBYEAR > 1989 AND ( LIMIT-TO ( SUBJAREA , "COMP" ) OR LIMIT-TO ( SUBJAREA , "MEDI" ) OR LIMIT-TO ( SUBJAREA , "HEAL" ) OR LIMIT-TO ( SUBJAREA , "NURS" ) ) AND ( LIMIT-TO ( DOCTYPE , "ar" ) OR LIMIT-TO ( DOCTYPE , "re" ) )               | 845,187   |
| ALL ( {primary health care} OR {primary healthcare} OR {primary care} OR {general pract*} OR {family pract*} OR {ambulatory setting*} OR {nurs*} OR {ambulatory care} OR {family                                                                                                                                            | 776,692   |

|                                                                                                                                                                                                                                                                                     |         |
|-------------------------------------------------------------------------------------------------------------------------------------------------------------------------------------------------------------------------------------------------------------------------------------|---------|
| medicine} ) AND PUBYEAR > 1989 AND ( LIMIT-<br>TO ( SUBJAREA , "MEDI" ) OR LIMIT-<br>TO ( SUBJAREA , "NURS" ) OR LIMIT-<br>TO ( SUBJAREA , "HEAL" ) OR LIMIT-<br>TO ( SUBJAREA , "COMP" ) ) AND ( LIMIT-<br>TO ( DOCTYPE , "ar" ) OR LIMIT-TO ( DOCTYPE , "re" ) )                  |         |
| #1 AND #2                                                                                                                                                                                                                                                                           | 9,975   |
| <b>Elsevier-ScienceDirect</b>                                                                                                                                                                                                                                                       |         |
| ("machine learning" OR "artificial intelligence" OR "deep learning") 1990-<br>2021, reviews, articles, medicine and dentistry, computer science                                                                                                                                     | 94,611  |
| ("primary health care" OR "primary healthcare" OR "primary care" OR "general<br>practice" OR "family practice" OR "ambulatory setting" OR nurs OR<br>"ambulatory care" OR "family medicine") 1990-2022, reviews, articles,<br>medicine and dentistry, Nursing and health profession | 168,917 |
| #1 AND #2                                                                                                                                                                                                                                                                           | 2,358   |
| <b>BioRxiv and MedRxiv</b>                                                                                                                                                                                                                                                          |         |
| "machine learning" and posted between "01 Jan, 1990 and 04 Jan, 2022"                                                                                                                                                                                                               | 16,363  |
| "primary health care" and posted between "01 Jan, 1990 and 04 Jan, 2022"                                                                                                                                                                                                            | 633     |
| "general practice" and posted between "01 Jan, 1990 and 04 Jan, 2022"                                                                                                                                                                                                               | 933     |
| #1 AND #2OR#3, subjects: all                                                                                                                                                                                                                                                        | 10,333  |
| #1 AND #2OR#3, subjects: Primary care research, nursing, bioinformatics                                                                                                                                                                                                             | 1,259   |
| <b>ACM Digital Library</b>                                                                                                                                                                                                                                                          |         |
| [All: "machine learning"] OR [All: "artificial intelligence"] OR [All: "deep<br>learning"] AND [Publication Date: (01/01/1990 TO 01/04/2022)]                                                                                                                                       | 19,970  |

|                                                                                                                                                                                                                                                                                                                                                                           |        |
|---------------------------------------------------------------------------------------------------------------------------------------------------------------------------------------------------------------------------------------------------------------------------------------------------------------------------------------------------------------------------|--------|
| [All: "primary health care"] OR [All: "primary healthcare"] OR [All: "primary care"] OR [All: "general pract*"] OR [All: "family pract*"] OR [All: "ambulatory setting*"] OR [All: nurs*] OR [All: "ambulatory care"] OR [All: "family medicine"] AND [Publication Date: (01/01/1990 TO 01/04/2022)]                                                                      | 5,589  |
| 1# AND #2                                                                                                                                                                                                                                                                                                                                                                 | 1,701  |
| <b>IEEE Xplore Digital Library</b>                                                                                                                                                                                                                                                                                                                                        |        |
| ("All Metadata":"machine learning" OR "All Metadata":"artificial intelligence" OR "All Metadata":"deep learning") Filters Applied: Journals, 1990 - 2022                                                                                                                                                                                                                  | 54,451 |
| ("All Metadata":"primary health care" OR "All Metadata":"primary healthcare" OR "All Metadata":"primary care" OR "All Metadata":"general pract*" OR "All Metadata":"family pract*" OR "All Metadata":"ambulatory setting*" OR "All Metadata":nurs* OR "All Metadata":"ambulatory care" OR "All Metadata":"family medicine")<br><br>Filters Applied: Journals, 1990 - 2022 | 601    |
| 1# AND #2                                                                                                                                                                                                                                                                                                                                                                 | 160    |
| Total retrieved studies                                                                                                                                                                                                                                                                                                                                                   | 23,045 |
