# Supplementary material for: A systematic review of clinical health conditions predicted by machine learning diagnostic and prognostic models trained or validated using real-world primary health care data
Source: PubMed Central journal article supplement (PMC10491005; doi:10.1371/journal.pone.0274276), 2023-09-08
Supplement: pone.0274276.s005.pdf [file pone.0274276.s005.pdf]

**S1 Panel. Quantitative summary of the included studies.**

|                                                                                                                                                                                                                                                                                                                                                                                                                                                                                   |                                                                                                                                                                                                                                                                                                                                                                                                                                                                                  |
|-----------------------------------------------------------------------------------------------------------------------------------------------------------------------------------------------------------------------------------------------------------------------------------------------------------------------------------------------------------------------------------------------------------------------------------------------------------------------------------|----------------------------------------------------------------------------------------------------------------------------------------------------------------------------------------------------------------------------------------------------------------------------------------------------------------------------------------------------------------------------------------------------------------------------------------------------------------------------------|
| <ul style="list-style-type: none"> <li>➤ <b>Total articles included:</b><br/>106</li> </ul>                                                                                                                                                                                                                                                                                                                                                                                       | <ul style="list-style-type: none"> <li>➤ <b>Total number of participants:</b><br/>24.2 million</li> </ul>                                                                                                                                                                                                                                                                                                                                                                        |
| <ul style="list-style-type: none"> <li>➤ <b>Publications by year:</b> <ul style="list-style-type: none"> <li>• 2002, 2008, 2014: one article each</li> <li>• 2010, 2013: three articles each</li> <li>• 2015: two articles</li> <li>• 2016: five articles</li> <li>• 2017: seven articles</li> <li>• 2018: ten articles</li> <li>• 2019: 22 articles</li> <li>• 2020: 25 articles</li> <li>• 2021: 25 articles</li> <li>• 2022: (up to Jan 4: one article)</li> </ul> </li> </ul> | <ul style="list-style-type: none"> <li>➤ <b>Countries under study: time reported</b> <ul style="list-style-type: none"> <li>• United States of America: 41</li> <li>• United Kingdom: 31</li> <li>• Netherlands: 11</li> <li>• Canada: 9</li> <li>• Spain: 6</li> <li>• Germany: 4</li> <li>• Sweden, China, Australia: 3 each</li> <li>• Russia, Denmark, Indonesia, Israel, Kuwait: 2 each</li> <li>• Croatia, Taiwan, Italy, Slovenia, Ukraine: 1 each</li> </ul> </li> </ul> |
| <ul style="list-style-type: none"> <li>➤ <b>Study design:</b> <ul style="list-style-type: none"> <li>• Pros. cohort: 8 articles</li> <li>• Retro. cohort: 63 articles</li> <li>• Retro. case control: 29 articles</li> <li>• Retro. nested case control: three articles</li> <li>• Cross sectional: three articles</li> </ul> </li> </ul>                                                                                                                                         | <ul style="list-style-type: none"> <li>➤ <b>Models' Purpose: 107</b> <ul style="list-style-type: none"> <li>• Inc. diagnostic: 62</li> <li>• Prev. diagnostic: 20</li> <li>• Prognostic: 25</li> </ul> </li> </ul>                                                                                                                                                                                                                                                               |
| <ul style="list-style-type: none"> <li>➤ <b>Type of modelling studies:</b> <ul style="list-style-type: none"> <li>• Development without external validation: 81</li> <li>• Development with external validation: 13</li> <li>• External validation: 12</li> </ul> </li> </ul>                                                                                                                                                                                                     | <ul style="list-style-type: none"> <li>➤ <b>Primary care data sources: time used for models' development and/or validation: 126</b> <ul style="list-style-type: none"> <li>• Exclusive PHC data: 92</li> <li>• Linked PHC data: 34</li> </ul> </li> </ul>                                                                                                                                                                                                                        |
| <ul style="list-style-type: none"> <li>➤ <b>Machine Learning models used: 207</b> <ul style="list-style-type: none"> <li>• Supervised ML: 172</li> <li>• Reinforcement ML: 35</li> </ul> <p>Natural language processing NLP: 5 (a preparatory step)</p> </li> </ul>                                                                                                                                                                                                               |                                                                                                                                                                                                                                                                                                                                                                                                                                                                                  |
| <ul style="list-style-type: none"> <li>➤ <b>Health conditions predicted (according to ICD-10 - 2019) (n= 42 across 106 studies)</b> <ol style="list-style-type: none"> <li><b>1. Endocrine, metabolic, nutritional diseases: 27</b> <ul style="list-style-type: none"> <li>• Diabetes mellitus: 10</li> <li>• Diabetic retinopathy: 5</li> <li>• Diabetic polyneuropathy: 3</li> <li>• Familial hypercholesterolemia: 3</li> </ul> </li> </ol> </li> </ul>                        |                                                                                                                                                                                                                                                                                                                                                                                                                                                                                  |

- Children obesity: 2
- Primary Aldosteronism: 1
- Diabetic foot: 1
- Diabetic nephropathy: 1
- Gestational Diabetes: 1

## **2. Circulatory: 23**

- Any cardiovascular disease: 7
- Heart failure: 5
- Hypertension: 5
- Atrial fibrillation: 2
- Stroke: 2
- Atherosclerosis: 1
- Myocardial infarction: 1

## **3. Mental and behavioral disorders: 21**

- Alzheimer's disease: 12
- Major depressive disorder: 3
- Post-partum depression: 1
- Psychosis: 1
- Post-traumatic stress disorder: 2
- Anxiety: 1
- Any mental disorder: 1

## **4. Respiratory system diseases: 10**

- Chronic obstructive pulmonary disease: 3
- Asthma: 2
- Influenza: 2
- Asthma/COPD overlap: 1
- COVID-19 : 1
- Nontuberculous mycobacterial lung: 1

## **5. Neoplasms: 8**

- Colorectal cancer: 6
- Lung cancer: 1
- Pancreatic cancer: 1

## **6. Musculoskeletal and connective tissue diseases: 6**

- Rheumatoid arthritis: 2
- Ankylosing spondylitis: 1
- Back pain: 1
- Fibromyalgia: 1
- Systemic lupus erythematosus: 1

## **7. Nervous: 3**

- Post stroke spasticity: 1
- Epilepsy: 1

- Progressive Supranuclear Palsy: **1**

**8. External cause of mortality: 3**

- Suicidality: 3

**9. Digestive: 2**

- Gastroesophageal reflux: 1
- Inflammatory bowel diseases: 1

**10. Genitourinary: 2**

- Chronic kidney disease: 2

**11. Pregnancy, childbirth, puerperium: 1**

- Preeclampsia: 1
